# Supplementary material for: Boron–boron bonds: boldly breaking boundaries towards amine- and peroxide-free 2K radical polymerization
Source: Royal Society of Chemistry journal article supplement (doi:10.1039/d4py00445k), 2024-01-01
Supplement: d4py00445k1.pdf [file d4py00445k1.pdf]

# Supporting Information

## Boron-Boron Bonds: Boldly Breaking Boundaries towards Amine- and Peroxide-Free 2K Radical Polymerization

Florian Pieringer<sup>a</sup>, Konstantin Knaipp<sup>b</sup>, Robert Liska<sup>a</sup>, Norbert Moszner<sup>c</sup>, Yohann Catel<sup>c</sup>, Georg Gescheidt<sup>b</sup>, Patrick Knaack<sup>a\*</sup>

### Materials

B6-1 (5,5,5',5'-Tetramethyl-2,2'-bi-1,3,2-dioxaborinan) (98%, BLD Pharm), B6-3 (4,4,4',4',6,6,6',6'-Octamethyl-2,2'-bi(1,3,2-dioxaborinane)) (97%, BLD Pharm), B5-1 (4,4,4',4',5,5,5',5'-Octamethyl-2,2'-bi-1,3,2-dioxaborolan) (99%, Merck), B5-2 (4,8-Dimethyl-2-(4,4,5,5-tetramethyl-1,3,2-dioxaborolan-2-yl)-1,3,6,2-dioxazaborocane) (95%, abcr), B5-3 (2-(Dimethylphenylsilyl)-4,4,5,5-tetramethyl-1,3,2-dioxaborolan) (95%, Merck), D3MA (Decandioldimethacrylate) (Ivoclar AG), UDMA (Urethanedimethacrylate) (Ivoclar AG), BisGMA (Bisphenol-A-glycidyl-dimethacrylate) (Ivoclar AG), Cu(acac)<sub>2</sub> (99.9%, Merck), Cu(tfacac)<sub>2</sub> (99%, abcr), Cu(hfacac)<sub>2</sub> (99%, Merck), Cu(ac)<sub>2</sub> (98%, Merck), Cu(ac) (98%, abcr), Tetrakis(dimethylamino)diboron (98%, BLD Pharm), 3-methylbutane-1,3-diol (97%, Merck) were used as received.

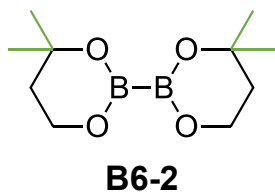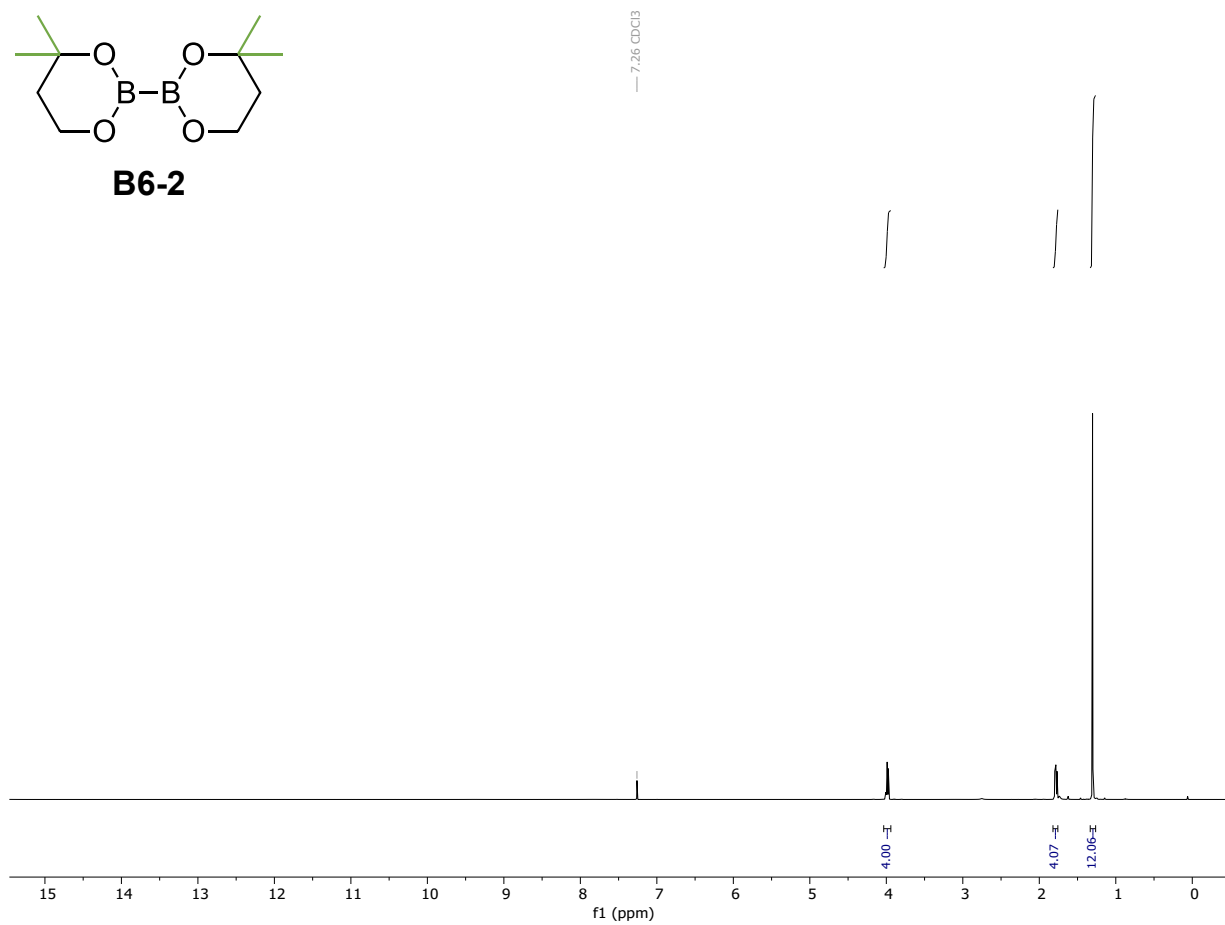

**SI Figure 1:** <sup>1</sup>H NMR of B6-2

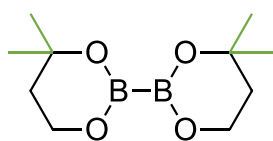

**B6-2**

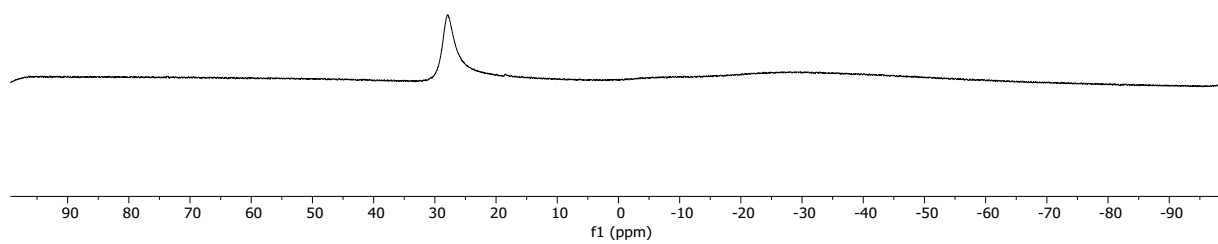

**SI Figure 2:**  $^{11}\text{B}$  NMR of B6-2

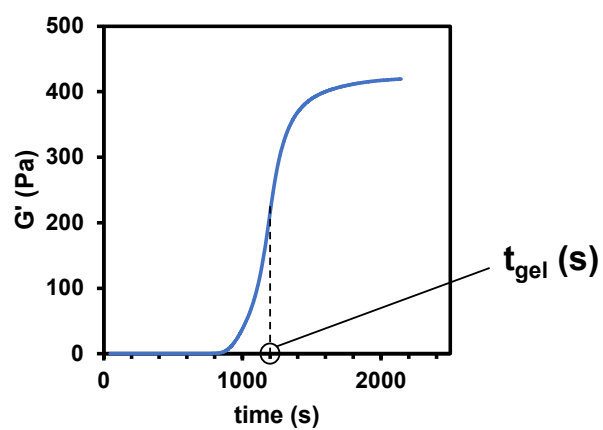

**SI Figure 3:** Schematic explanation of  $t_{\text{gel}}$  as the time of maximum increase in  $G'$ .

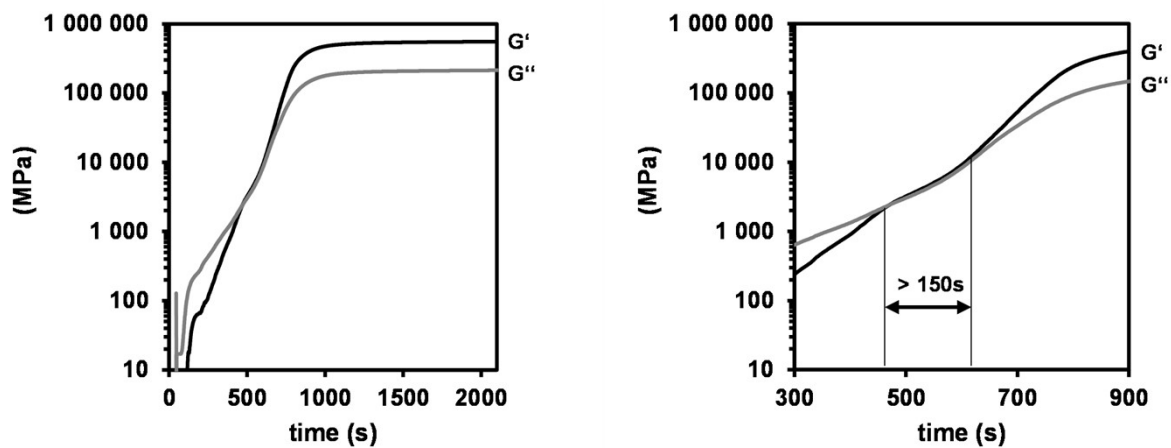

SI Figure 4: Rheology/IR measurement, showing the parallel section of  $G'$  and  $G''$ , making it not viable to use the intersection of those parameters for evaluation of  $t_{gel}$ .

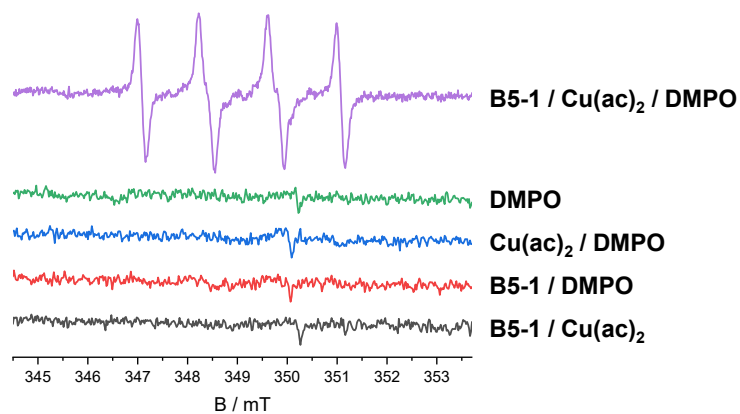

SI Figure 5: Blank experiment with ESR-ST

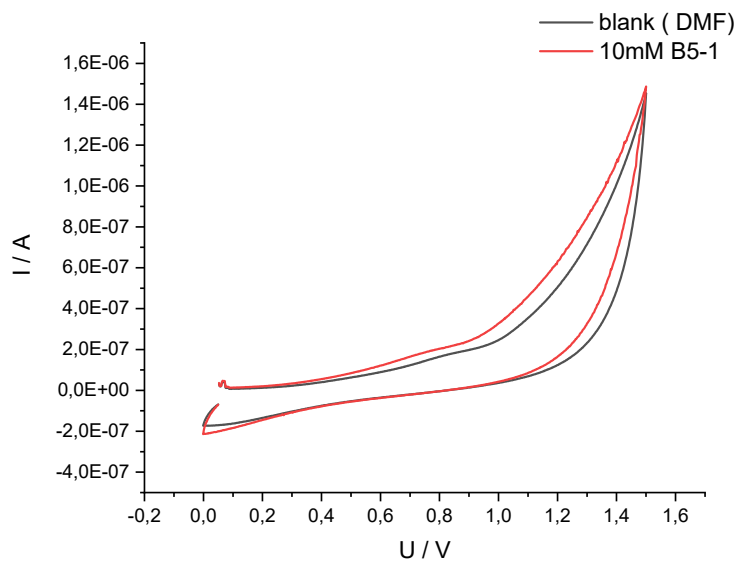

**SI Figure 6:** Cyclic voltammetry measurement of a blank sample and a 10 mM solution of B5-1 in dimethylformamide.

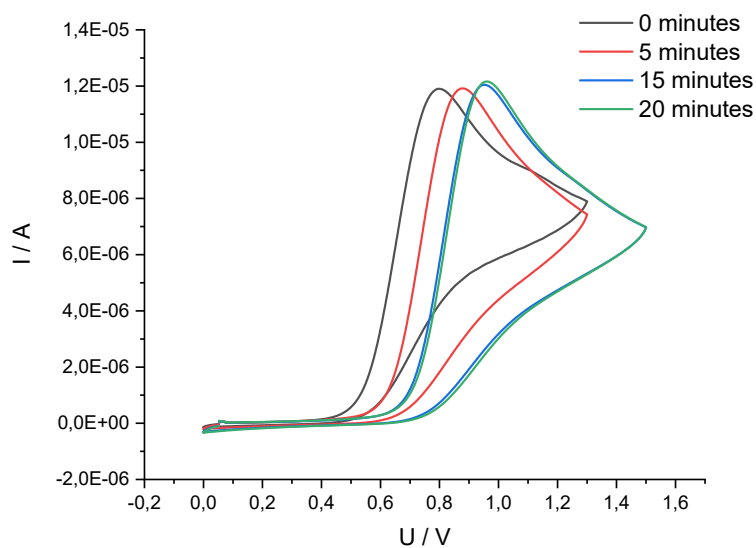

**SI Figure 7:** Cyclic voltammetry measurements of a 10 mM solution of Na(acac) after addition of 10 mM B5-1. Additional cyclovoltammograms are recorded after 5, 15 and 20 minutes respectively.

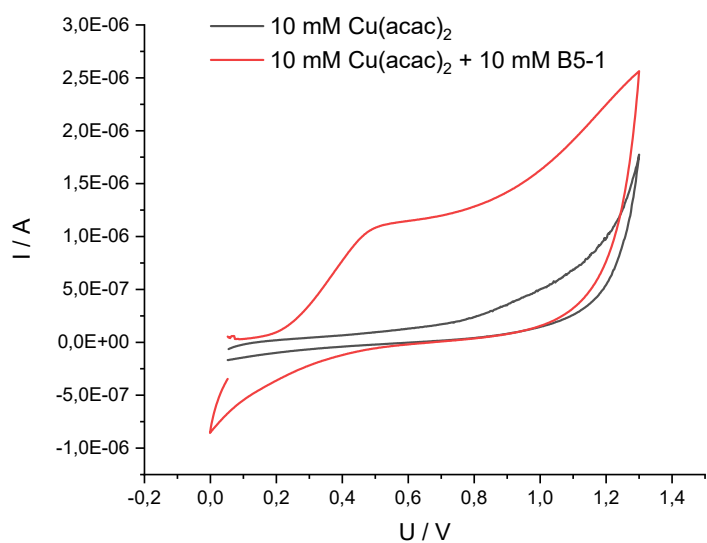

**SI Figure 8:** Cyclic voltammetry measurements of a 10 mM solution of  $\text{Cu}(\text{acac})_2$  before and after addition of 1 equivalent B5-1.

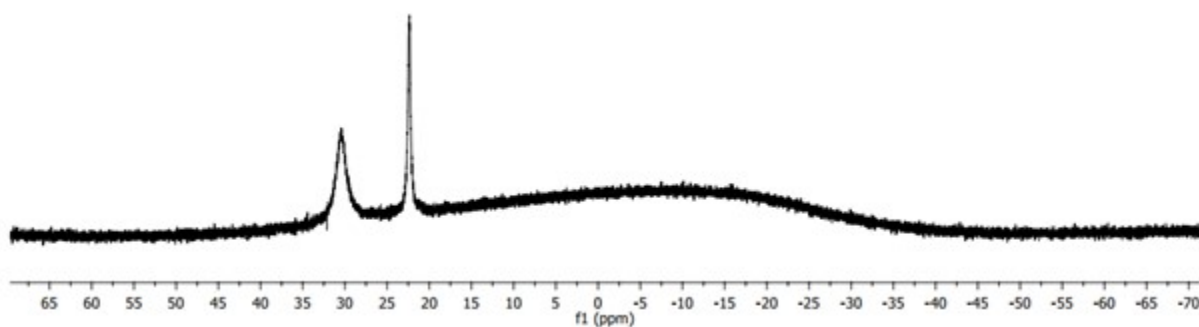

**SI Figure 9:**  $^{11}\text{B}$  NMR of a solution of  $\text{Cu}(\text{ac})_2$  (1.14 mM) and B5-1 (20 mM) in deuterated acetonitrile. The spectrum was recorded one hour after the degassed stock solutions were combined.

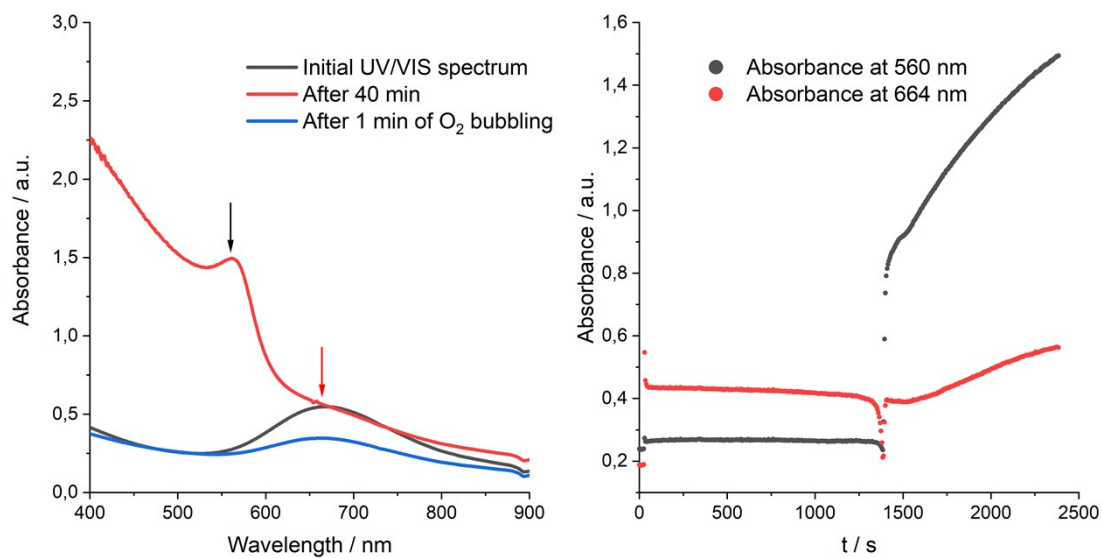

**SI Figure 10:** On the left, UV/Vis spectroscopy of a solution containing B5-1 (20 mM), Cu(ac)<sub>2</sub> (1.14 mM) and methylmethacrylate (100 mM) in dry acetonitrile. Spectra shown are recorded immediately after combining the degassed stock solutions, after 40 minutes and after bubbling the solution with O<sub>2</sub> for one minute. Kinetic traces are shown on the right.

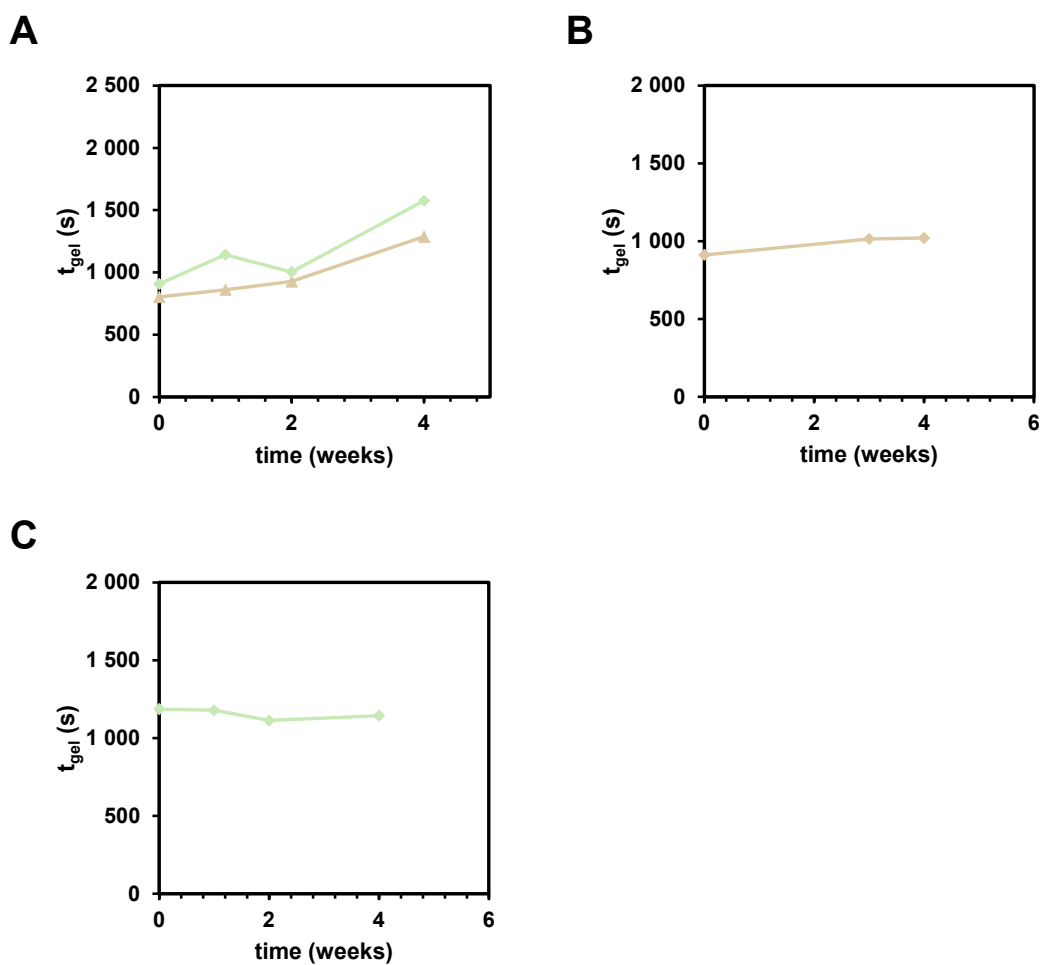

**SI Figure 11:** **A:** Long-time reactivity displayed as progression of  $t_{gel}$  over time. B6-1 (green) and B5-2 (brown) were investigated in Mix-3. **B:** Long-time reactivity displayed as progression of  $t_{gel}$  over time. B5-2 (brown) was investigated in D3MA/BisGMA (1:3 (w%)). **C:** Long-time reactivity displayed as progression of  $t_{gel}$  over time. B6-1 (green) was investigated in pure D3MA.



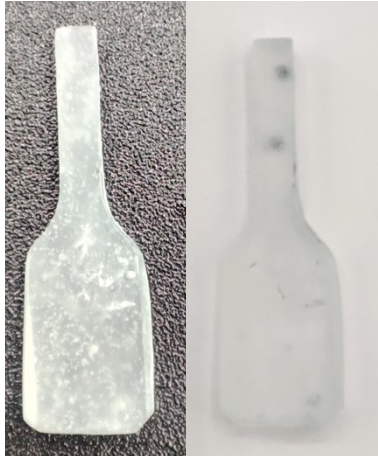

**SI Figure 12:** Picture of cured specimen, showing no discoloration after weeks of storage. For better visibility one picture was taken in front of a black background and one in front of a white background.

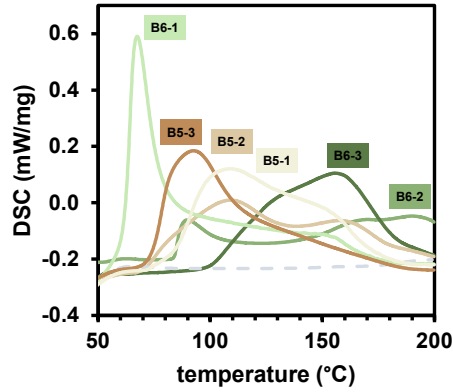

**SI Figure 13:** DSC measurements to confirm thermal polymerization of Mix-3 with diborane compounds. To evaluate the thermal polymerization of the formulations under investigation DSC experiments were conducted using a Netzsch Jupiter STA 449 F1 thermal analysis tool with an autosampler. The experiments involved a ramp from 25 to 200 °C under N<sub>2</sub> atmosphere (10 K min<sup>-1</sup>), which was performed twice to gather a baseline. All samples were precisely weighed into aluminum DSC pans (10 ± 2 mg) and subjected to a constant gas flow rate (40 mL min<sup>-1</sup>). The DSC signal was recorded.

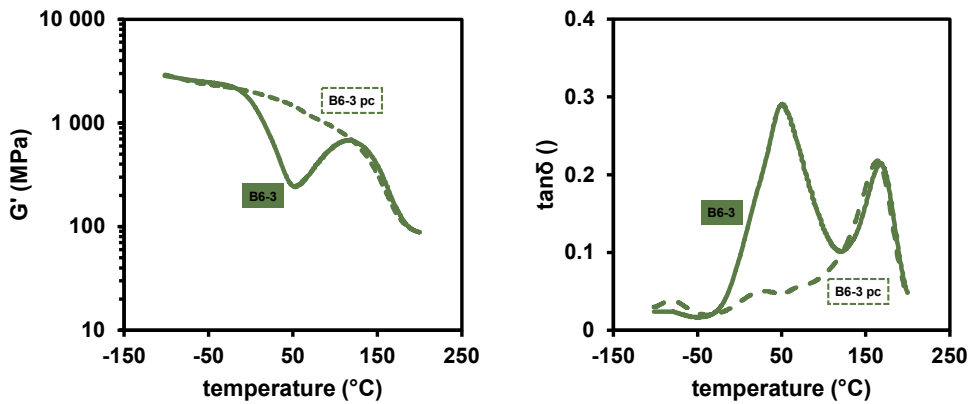

**SI Figure 14:** Left: Progression of  $G'$  during DMTA measurement without (solid line) and with (dashed line) post-curing for 24h at 100 °C. Right: Progression of  $\tan\delta$  during DMTA measurement without (solid line) and with (dashed line) post-curing for 24h at 100 °C. Post-curing possible, reaching  $T_g > 150^\circ\text{C}$ .

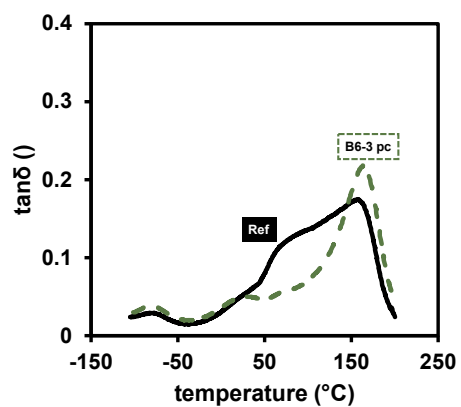

**SI Figure 15:** Very narrow  $T_g$  of the B6-3/Cu(acac)<sub>2</sub> cured formulation after post-curing compared to commercial FRP (CHP/Cu(acac)<sub>2</sub>/Thiourea)<sup>50</sup> polymerized Mix-3, showing a homogeneous network structure.
